# Supplementary material for: Genome-wide characterization and expression analysis of PP2CA family members in response to ABA and osmotic stress in Gossypium
Source: PeerJ. 2019 Jun 14;7:e7105. doi: 10.7717/peerj.7105 (PMC6573834; doi:10.7717/peerj.7105)
Supplement: Supplemental Information 3 — 114, 116, 239 and 232 PP2Cs were identified from G. arboretum, G. raimondii, G. hirsutum and G. barbadense, respectively. [file peerj-07-7105-s003.xlsx]

## Sheet: Sheet1
GaPP2C	GrPP2C	GhPP2C	GbPP2C
Cotton_A_00631	Gorai.001G007600	Gh_A01G0446	GOBAR_AA34888
Cotton_A_00941	Gorai.001G013500	Gh_A01G0829	GOBAR_AA28963
Cotton_A_01143	Gorai.001G038400	Gh_A01G1412	GOBAR_AA05844
Cotton_A_01160	Gorai.001G146200	Gh_A02G0289	GOBAR_AA37938
Cotton_A_01365	Gorai.002G068200	Gh_A02G0440	GOBAR_AA00941
Cotton_A_01630	Gorai.002G114300	Gh_A02G0495	GOBAR_AA29812
Cotton_A_01983	Gorai.002G199700	Gh_A02G0535	GOBAR_AA37246
Cotton_A_02451	Gorai.003G001500	Gh_A02G0554	GOBAR_AA32894
Cotton_A_02676	Gorai.003G016400	Gh_A02G0711	GOBAR_AA28348
Cotton_A_02838	Gorai.003G080700	Gh_A02G0874	GOBAR_AA24736
Cotton_A_03112	Gorai.003G128900	Gh_A02G0999	GOBAR_AA08348
Cotton_A_03216	Gorai.003G132200	Gh_A02G1068	GOBAR_AA03615
Cotton_A_03430	Gorai.003G146400	Gh_A02G1565	GOBAR_AA27848
Cotton_A_04216	Gorai.004G049400	Gh_A02G1712	GOBAR_AA09594
Cotton_A_04838	Gorai.004G056100	Gh_A02G1744	GOBAR_AA34839
Cotton_A_05161	Gorai.004G097000	Gh_A03G0236	GOBAR_AA11379
Cotton_A_05582	Gorai.004G115400	Gh_A03G0373	GOBAR_AA03316
Cotton_A_05714	Gorai.004G232300	Gh_A03G1305	GOBAR_AA12151
Cotton_A_05792	Gorai.004G237900	Gh_A03G1393	GOBAR_AA27223
Cotton_A_06262	Gorai.004G238400	Gh_A03G1533	GOBAR_AA30591
Cotton_A_06937	Gorai.004G263300	Gh_A03G1618	GOBAR_AA01048
Cotton_A_07582	Gorai.004G284400	Gh_A03G1821	GOBAR_AA27733
Cotton_A_07892	Gorai.004G293300	Gh_A03G2080	GOBAR_AA11316
Cotton_A_08087	Gorai.005G041400	Gh_A03G2091	GOBAR_AA17958
Cotton_A_08314	Gorai.005G055900	Gh_A03G2156	GOBAR_AA12929
Cotton_A_08392	Gorai.005G062200	Gh_A04G0291	GOBAR_AA07414
Cotton_A_08639	Gorai.005G067600	Gh_A04G0660	GOBAR_AA24738
Cotton_A_08724	Gorai.005G069500	Gh_A04G0818	GOBAR_AA30984
Cotton_A_08742	Gorai.005G084400	Gh_A04G0881	GOBAR_AA17666
Cotton_A_08875	Gorai.005G103200	Gh_A04G0904	GOBAR_AA10156
Cotton_A_10138	Gorai.005G114600	Gh_A04G0971	GOBAR_AA11331
Cotton_A_10339	Gorai.005G126900	Gh_A04G1366	GOBAR_AA20610
Cotton_A_10496	Gorai.005G192600	Gh_A04G1468	GOBAR_AA32785
Cotton_A_10578	Gorai.005G204100	Gh_A05G0034	GOBAR_AA00757
Cotton_A_10599	Gorai.005G218800	Gh_A05G0052	GOBAR_AA29950
Cotton_A_10632	Gorai.005G221200	Gh_A05G0308	GOBAR_AA23820
Cotton_A_10703	Gorai.005G233000	Gh_A05G0495	GOBAR_AA06562
Cotton_A_10710	Gorai.005G255000	Gh_A05G0515	GOBAR_AA32503
Cotton_A_11498	Gorai.006G001800	Gh_A05G0782	GOBAR_AA26179
Cotton_A_11520	Gorai.006G053000	Gh_A05G0814	GOBAR_AA18301
Cotton_A_11854	Gorai.006G172900	Gh_A05G0931	GOBAR_AA32573
Cotton_A_12041	Gorai.006G177400	Gh_A05G0947	GOBAR_AA13156
Cotton_A_12593	Gorai.006G185900	Gh_A05G1006	GOBAR_AA32730
Cotton_A_12673	Gorai.006G201000	Gh_A05G1136	GOBAR_AA16211
Cotton_A_12895	Gorai.006G252800	Gh_A05G1737	GOBAR_AA15377
Cotton_A_14028	Gorai.006G255900	Gh_A05G1939	GOBAR_AA30010
Cotton_A_14905	Gorai.006G257900	Gh_A05G2885	GOBAR_AA35002
Cotton_A_14941	Gorai.006G263300	Gh_A05G3030	GOBAR_AA32728
Cotton_A_15173	Gorai.007G006600	Gh_A05G3395	GOBAR_AA05623
Cotton_A_15251	Gorai.007G047600	Gh_A05G3589	GOBAR_AA00724
Cotton_A_15993	Gorai.007G118600	Gh_A05G3929	GOBAR_AA33595
Cotton_A_16386	Gorai.007G190900	Gh_A06G0149	GOBAR_AA19132
Cotton_A_17098	Gorai.007G205500	Gh_A06G0288	GOBAR_AA03194
Cotton_A_17736	Gorai.007G220800	Gh_A06G0428	GOBAR_AA14018
Cotton_A_17738	Gorai.007G302900	Gh_A06G0562	GOBAR_AA35155
Cotton_A_17975	Gorai.007G303500	Gh_A06G0579	GOBAR_AA40945
Cotton_A_18016	Gorai.007G379200	Gh_A06G0809	GOBAR_AA00126
Cotton_A_18496	Gorai.008G037200	Gh_A06G0927	GOBAR_AA28771
Cotton_A_18502	Gorai.008G136500	Gh_A06G0943	GOBAR_AA31603
Cotton_A_18557	Gorai.008G228000	Gh_A06G1927	GOBAR_AA21232
Cotton_A_18795	Gorai.008G267600	Gh_A06G1938	GOBAR_AA22004
Cotton_A_18842	Gorai.008G269800	Gh_A07G0033	GOBAR_AA00034
Cotton_A_18867	Gorai.008G270000	Gh_A07G0123	GOBAR_AA02316
Cotton_A_19215	Gorai.008G282600	Gh_A07G0268	GOBAR_AA13317
Cotton_A_19253	Gorai.009G010900	Gh_A07G1188	GOBAR_AA18283
Cotton_A_19592	Gorai.009G013000	Gh_A08G0349	GOBAR_AA02661
Cotton_A_19885	Gorai.009G042600	Gh_A08G0409	GOBAR_AA10456
Cotton_A_20362	Gorai.009G046600	Gh_A08G0735	GOBAR_AA04949
Cotton_A_20364	Gorai.009G063600	Gh_A08G1791	GOBAR_AA27314
Cotton_A_20548	Gorai.009G065500	Gh_A08G1838	GOBAR_AA33530
Cotton_A_20575	Gorai.009G096200	Gh_A08G1843	GOBAR_AA13331
Cotton_A_20905	Gorai.009G099400	Gh_A08G2002	GOBAR_AA09110
Cotton_A_20972	Gorai.009G111500	Gh_A08G2192	GOBAR_AA04529
Cotton_A_21709	Gorai.009G113300	Gh_A08G2271	GOBAR_AA20705
Cotton_A_21744	Gorai.009G122700	Gh_A09G0015	GOBAR_AA24517
Cotton_A_22162	Gorai.009G143300	Gh_A09G0413	GOBAR_AA03808
Cotton_A_22233	Gorai.009G211100	Gh_A09G0531	GOBAR_AA28426
Cotton_A_22308	Gorai.009G236500	Gh_A09G1459	GOBAR_AA40572
Cotton_A_22643	Gorai.009G379300	Gh_A09G1499	GOBAR_AA33201
Cotton_A_23241	Gorai.009G421600	Gh_A09G1649	GOBAR_AA03790
Cotton_A_24159	Gorai.010G018200	Gh_A09G2032	GOBAR_AA19024
Cotton_A_24834	Gorai.010G040100	Gh_A09G2052	GOBAR_AA38624
Cotton_A_24974	Gorai.010G056900	Gh_A09G2109	GOBAR_AA10033
Cotton_A_25088	Gorai.010G074600	Gh_A09G2224	GOBAR_AA11918
Cotton_A_25089	Gorai.010G076700	Gh_A09G2406	GOBAR_AA34281
Cotton_A_25914	Gorai.010G102900	Gh_A10G0578	GOBAR_AA02575
Cotton_A_25947	Gorai.010G119300	Gh_A10G0846	GOBAR_AA05141
Cotton_A_26063	Gorai.010G120600	Gh_A10G1451	GOBAR_AA18459
Cotton_A_26176	Gorai.010G138600	Gh_A10G1487	GOBAR_AA16935
Cotton_A_26494	Gorai.010G203500	Gh_A10G1539	GOBAR_AA12386
Cotton_A_27358	Gorai.010G222200	Gh_A10G1864	GOBAR_AA39289
Cotton_A_27758	Gorai.011G071200	Gh_A10G1998	GOBAR_AA15251
Cotton_A_28663	Gorai.011G181400	Gh_A10G2160	GOBAR_AA39854
Cotton_A_29291	Gorai.011G189700	Gh_A11G0049	GOBAR_AA40202
Cotton_A_29400	Gorai.011G194000	Gh_A11G0382	GOBAR_AA36598
Cotton_A_29630	Gorai.011G200800	Gh_A11G0962	GOBAR_AA37025
Cotton_A_30081	Gorai.011G242300	Gh_A11G1584	GOBAR_AA35248
Cotton_A_30706	Gorai.011G268200	Gh_A11G1717	GOBAR_AA38318
Cotton_A_30898	Gorai.011G292300	Gh_A11G1975	GOBAR_AA11013
Cotton_A_30961	Gorai.012G003400	Gh_A11G2459	GOBAR_AA13795
Cotton_A_31719	Gorai.012G026700	Gh_A11G2464	GOBAR_AA39718
Cotton_A_32594	Gorai.012G072200	Gh_A11G2946	GOBAR_AA10641
Cotton_A_33631	Gorai.012G077700	Gh_A12G0335	GOBAR_AA01673
Cotton_A_34085	Gorai.012G092200	Gh_A12G1105	GOBAR_AA15089
Cotton_A_34653	Gorai.012G100800	Gh_A12G1910	GOBAR_AA27276
Cotton_A_34672	Gorai.012G119300	Gh_A12G2253	GOBAR_AA08581
Cotton_A_35071	Gorai.012G126900	Gh_A12G2274	GOBAR_AA08580
Cotton_A_35109	Gorai.012G130800	Gh_A12G2276	GOBAR_AA23493
Cotton_A_36258	Gorai.012G142300	Gh_A12G2380	GOBAR_AA39538
Cotton_A_36348	Gorai.012G156600	Gh_A13G0184	GOBAR_AA03568
Cotton_A_36451	Gorai.013G001000	Gh_A13G0786	GOBAR_AA21020
Cotton_A_36946	Gorai.013G022100	Gh_A13G0910	GOBAR_AA31021
Cotton_A_38988	Gorai.013G049000	Gh_A13G1741	GOBAR_AA40553
Cotton_A_39142	Gorai.013G127100	Gh_A13G2033	GOBAR_AA15787
	Gorai.013G230300	Gh_A13G2073	GOBAR_AA40225
	Gorai.013G269500	Gh_A13G2104	GOBAR_AA37734
		Gh_A13G2220	GOBAR_DD33530
		Gh_D01G0456	GOBAR_DD22350
		Gh_D01G0857	GOBAR_DD13768
		Gh_D01G1654	GOBAR_DD20225
		Gh_D02G0354	GOBAR_DD12855
		Gh_D02G0490	GOBAR_DD24972
		Gh_D02G0555	GOBAR_DD22534
		Gh_D02G0601	GOBAR_DD28712
		Gh_D02G0618	GOBAR_DD23572
		Gh_D02G0754	GOBAR_DD04713
		Gh_D02G0915	GOBAR_DD25756
		Gh_D02G1004	GOBAR_DD31999
		Gh_D02G1114	GOBAR_DD31537
		Gh_D02G1742	GOBAR_DD04210
		Gh_D02G1853	GOBAR_DD30544
		Gh_D02G1994	GOBAR_DD13498
		Gh_D02G2032	GOBAR_DD13406
		Gh_D02G2254	GOBAR_DD08720
		Gh_D03G0007	GOBAR_DD31690
		Gh_D03G0159	GOBAR_DD29111
		Gh_D03G0739	GOBAR_DD35228
		Gh_D03G1169	GOBAR_DD37768
		Gh_D03G1209	GOBAR_DD38067
		Gh_D03G1334	GOBAR_DD10883
		Gh_D04G0015	GOBAR_DD25223
		Gh_D04G0189	GOBAR_DD17053
		Gh_D04G0612	GOBAR_DD13674
		Gh_D04G0660	GOBAR_DD25308
		Gh_D04G0789	GOBAR_DD22444
		Gh_D04G0866	GOBAR_DD12476
		Gh_D04G1125	GOBAR_DD08824
		Gh_D04G1315	GOBAR_DD24267
		Gh_D04G1383	GOBAR_DD09388
		Gh_D04G1418	GOBAR_DD06699
		Gh_D04G1514	GOBAR_DD08645
		Gh_D04G1656	GOBAR_DD25162
		Gh_D05G0089	GOBAR_DD29723
		Gh_D05G0109	GOBAR_DD17767
		Gh_D05G0410	GOBAR_DD19448
		Gh_D05G0451	GOBAR_DD06490
		Gh_D05G0614	GOBAR_DD21539
		Gh_D05G0634	GOBAR_DD10861
		Gh_D05G0933	GOBAR_DD34369
		Gh_D05G1015	GOBAR_DD32331
		Gh_D05G1032	GOBAR_DD20680
		Gh_D05G1124	GOBAR_DD26742
		Gh_D05G1309	GOBAR_DD21145
		Gh_D05G1932	GOBAR_DD32495
		Gh_D05G2170	GOBAR_DD02218
		Gh_D05G3363	GOBAR_DD16138
		Gh_D05G3420	GOBAR_DD15670
		Gh_D05G3748	GOBAR_DD16672
		Gh_D05G3907	GOBAR_DD32985
		Gh_D06G0129	GOBAR_DD35994
		Gh_D06G0308	GOBAR_DD05252
		Gh_D06G0465	GOBAR_DD06315
		Gh_D06G0636	GOBAR_DD07153
		Gh_D06G0657	GOBAR_DD19219
		Gh_D06G0938	GOBAR_DD05589
		Gh_D06G1090	GOBAR_DD18288
		Gh_D06G1108	GOBAR_DD31894
		Gh_D06G1822	GOBAR_DD08434
		Gh_D06G1964	GOBAR_DD19521
		Gh_D07G0078	GOBAR_DD27985
		Gh_D07G0324	GOBAR_DD28575
		Gh_D07G1289	GOBAR_DD37134
		Gh_D07G2383	GOBAR_DD16783
		Gh_D08G0447	GOBAR_DD13550
		Gh_D08G0500	GOBAR_DD12665
		Gh_D08G0872	GOBAR_DD29822
		Gh_D08G1045	GOBAR_DD18883
		Gh_D08G2140	GOBAR_DD06107
		Gh_D08G2196	GOBAR_DD31912
		Gh_D08G2201	GOBAR_DD18037
		Gh_D08G2396	GOBAR_DD15095
		Gh_D08G2557	GOBAR_DD13945
		Gh_D08G2638	GOBAR_DD10735
		Gh_D09G0013	GOBAR_DD05518
		Gh_D09G0527	GOBAR_DD01019
		Gh_D09G1468	GOBAR_DD10426
		Gh_D09G1509	GOBAR_DD17323
		Gh_D09G1594	GOBAR_DD36598
		Gh_D09G1743	GOBAR_DD15865
		Gh_D09G2216	GOBAR_DD36095
		Gh_D09G2240	GOBAR_DD33806
		Gh_D09G2259	GOBAR_DD06443
		Gh_D09G2315	GOBAR_DD03345
		Gh_D10G0622	GOBAR_DD09310
		Gh_D10G1347	GOBAR_DD30975
		Gh_D10G1610	GOBAR_DD15257
		Gh_D10G1694	GOBAR_DD15665
		Gh_D10G1730	GOBAR_DD19797
		Gh_D10G1786	GOBAR_DD06070
		Gh_D10G2129	GOBAR_DD23938
		Gh_D10G2305	GOBAR_DD26063
		Gh_D10G2408	GOBAR_DD35606
		Gh_D11G0053	GOBAR_DD15480
		Gh_D11G0444	GOBAR_DD02740
		Gh_D11G1112	GOBAR_DD05593
		Gh_D11G1741	GOBAR_DD19051
		Gh_D11G1875	GOBAR_DD01169
		Gh_D11G2000	GOBAR_DD22047
		Gh_D11G2776	GOBAR_DD17402
		Gh_D11G2782	GOBAR_DD23912
		Gh_D11G3333	GOBAR_DD24817
		Gh_D12G0330	GOBAR_DD14691
		Gh_D12G1229	GOBAR_DD09073
		Gh_D12G2090	GOBAR_DD35015
		Gh_D12G2402	GOBAR_DD17949
		Gh_D12G2424	GOBAR_DD32232
		Gh_D12G2426	GOBAR_DD13433
		Gh_D12G2508	GOBAR_DD22120
		Gh_D13G0010	GOBAR_DD07511
		Gh_D13G0199	GOBAR_DD36625
		Gh_D13G0441	GOBAR_DD18574
		Gh_D13G0940	GOBAR_DD22078
		Gh_D13G1154
		Gh_D13G2089
		Gh_D13G2435
		Sca005057G02
		Sca009376G01
		Sca051315G01
		Sca056241G01
